# Supplementary material for: Dll1+ quiescent tumor stem cells drive chemoresistance in breast cancer through NF-κB survival pathway
Source: PubMed Central journal article supplement (PMC7813834; doi:10.1038/s41467-020-20664-5), 2021-01-18
Supplement: 41467_2020_20664_MOESM1_ESM.pdf [file 41467_2020_20664_MOESM1_ESM.pdf]

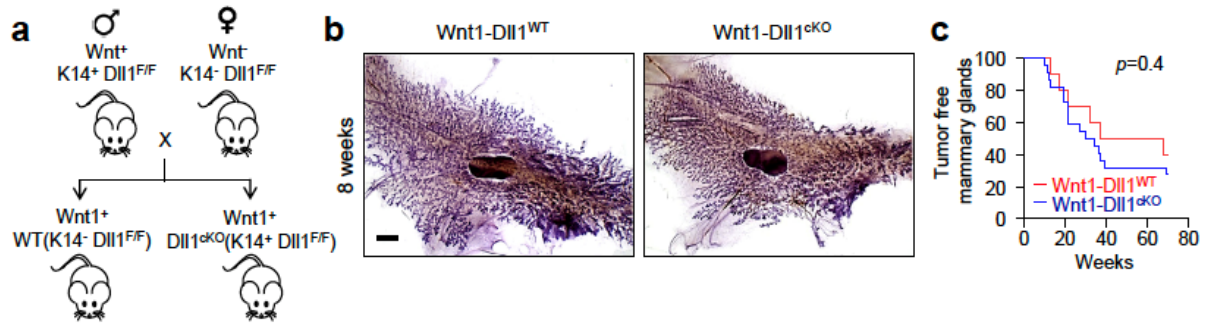

**Supplementary Fig. 1: The loss of Dll1 does not influence tumor onset in the MMTV-Wnt1 model.** **a** Schematic shows the strategy to generate MMTV-Wnt1; Dll1<sup>cKO</sup> female C57BL/6 mice. **b** The representative whole mount alum carmine-stained images showed the hyperplasia stages of MMTV-Wnt1 in indicated Dll1 genotypes (n=2 mammary glands per genotype at the age of eight weeks). **c** Kinetics of mammary tumor onset in MMTV-Wnt1 females of indicated Dll1 genotypes. Wnt1-Dll1<sup>WT</sup> (n=10) and Wnt1-Dll1<sup>cKO</sup> (n=22). The tumors were considered positive when the tumor was 3x3 mm in dimension. P value was calculated using the two-tailed Log-Rank test (**c**). Scale bars, 500  $\mu m$  (**b**). Data were obtained from two (**b**) or seven (**c**) independent experiments. Source data are provided as a source data file.

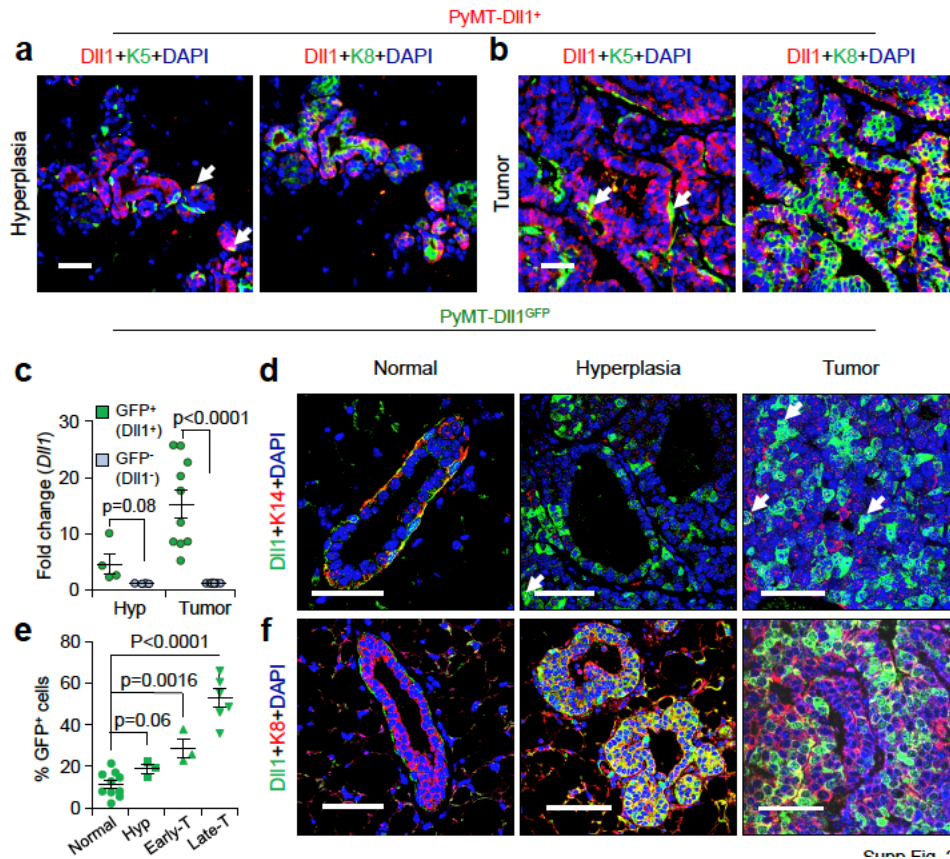

**Supplementary Fig. 2: PyMT-DII1<sup>mCh</sup> and PyMT-DII1<sup>GFP</sup> reporter mice show an increased number of DII1<sup>+</sup> cells in tumors during luminal tumor development. a, b** Representative immunofluorescence (IF) images of the hyperplasia and tumor of PyMT-DII1<sup>mCh</sup> mice show basal K5, luminal K8 and mCherry (DII1) expressions (n=3 hyperplasia or tumors per group). mCherry antibody was used to detect DII1<sup>mCh</sup><sup>+</sup> cells. White arrows indicate K5<sup>+</sup>DII1<sup>+</sup> cells. **c** qPCR analyses show that DII1<sup>+</sup> (GFP<sup>+</sup>) cells express a significantly higher level of *DII1* mRNA compared to DII1<sup>-</sup> (GFP<sup>-</sup>) cells. Hyperplastic mammary glands and tumors were enzymatically digested and sorted for lineage negative (CD45<sup>-</sup>CD31<sup>-</sup>TER119<sup>-</sup>) DII1<sup>+</sup> or DII1<sup>-</sup> cells by GFP expression to quantify *DII1* mRNA levels (n=4 hyperplasia and n=10 tumor samples). DII1<sup>-</sup> (GFP<sup>-</sup>) cells were considered fold change 1. **d, f** Representative immunofluorescence (IF) images of the normal mammary

gland, hyperplasia, and tumor of PyMT-Dll1<sup>GFP</sup> mice show increased number of Dll1<sup>+</sup> cells with tumor development. GFP antibody was used to detect Dll1<sup>GFP+</sup> expression. The Dll1<sup>+</sup> cells (GFP) reside in the basal layer (K14<sup>+</sup>) of the normal mammary gland, which changes during tumor progression and co-localize with luminal cells (K8<sup>+</sup>) in hyperplasia and tumor (n=3 mammary gland or tumors per group). White arrows indicate K14<sup>+</sup>Dll1<sup>+</sup> cells. **a, b, d** White arrows indicate cells double positive for basal markers and Dll1. **a, b, d, f** Please see more representative images in the supplementary figure 11. **e** The quantification of flow cytometry data of Lin<sup>-</sup> tumor cells show increasing Dll1<sup>+</sup> cells by GFP expression in PyMT-Dll1<sup>GFP</sup> mice from normal to Hyperplasia (Hyp) and tumor (T) stages (**e** n=10 normal, n=3 hyperplasia, n=3 early tumors and n=6 late tumors). **c** P values were calculated using two-tailed Student's *t*-test by comparing individual groups. **e** P values were calculated using One-way ANOVA with Tukey's multiple comparisons post hoc test. **c,e** Data are presented as the mean  $\pm$  SEM. Scale bars, 40  $\mu$ m (**a,b,d,f**). Source data are provided as a source data file.

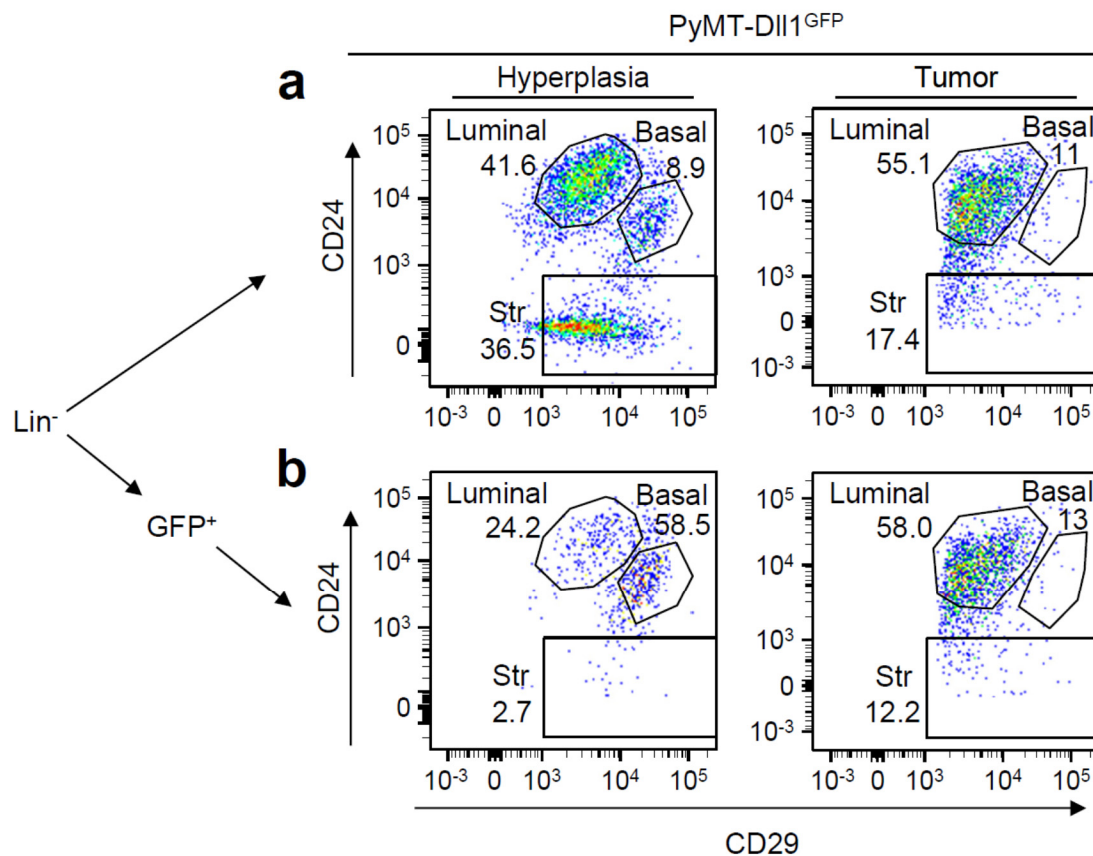

**Supplementary Fig. 3: Flow cytometry data show total tumor cell population in hyperplasia and in tumor stage. a,b** Flow cytometry profile of Lin<sup>-</sup> cells (a) or Lin<sup>-</sup> DII1<sup>+</sup> cells (b) from PyMT-DII1<sup>GFP</sup> hyperplasia and tumor show basal and luminal population during luminal tumor progression. As hyperplasia progresses to tumor, more luminal cells are observed in the tumors. n=3 PyMT-DII1<sup>GFP</sup> hyperplasia (at age of 8-weeks) and tumors. Seven independent experiments were performed to obtain the represented flow figures.



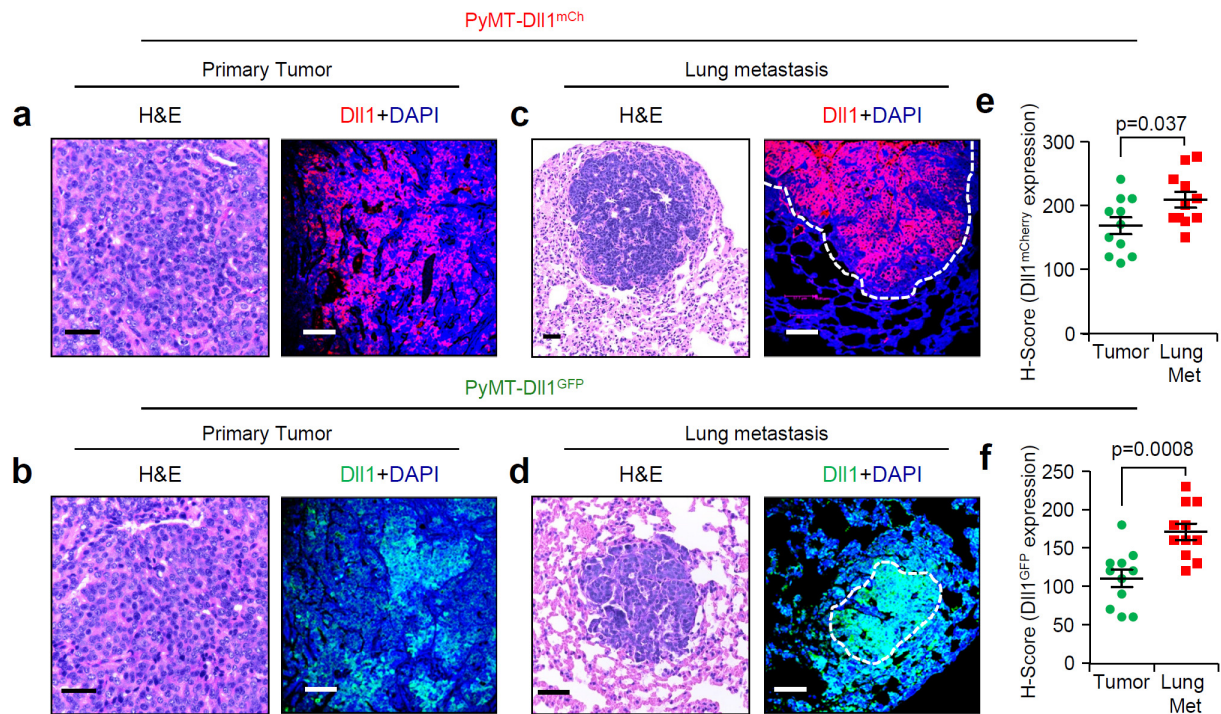

**Supplementary Fig. 4: Dll1 is strongly expressed in metastatic lung tumor cells compared to primary mammary tumor.** **a,b** Representative tumor H&Es show tumor morphology and IF images show expression of Dll1 in the primary tumors of PyMT-Dll1<sup>mCh</sup> (**a**) and PyMT-Dll1<sup>GFP</sup> mice (**b**). **c,d** Representative H&Es depict lung nodule morphology and IF images show expression of Dll1 in metastatic lung nodules of PyMT-Dll1<sup>mCh</sup> (**c**) and PyMT-Dll1<sup>GFP</sup> mice (**d**). mCherry antibody was used to detect Dll1<sup>mCh</sup> cells in tumor or lung nodules of PyMT-Dll1<sup>mCh</sup> mice. GFP antibody was used to detect Dll1<sup>GFP</sup> cells in tumor or lung nodules of PyMT-Dll1<sup>GFP</sup> mice. **e,f** The scatter plots show quantification of Dll1 H-score in tumor and lung nodules of PyMT-Dll1<sup>mCh</sup> (**e**) and PyMT-Dll1<sup>GFP</sup> (**f**). The H-score represents the Dll1 (mCherry/GFP) intensity (scale 0-3) multiplied with abundance of Dll1<sup>+</sup> cells (scale 0-100). **e,f** The dots in scatter plots represent n=11 FOV/group from four tumors and four lung nodules each group. For IF,

the formalin-fixed tumors and lungs were stained with the mCherry and GFP antibodies to detect Dll1<sup>+</sup> tumor cells. Scale bars, 60  $\mu\text{m}$ . Data present seven (**a-d**) independent experiments. Data are presented as the mean  $\pm$  SEM. Seven independent experiments were performed to obtain the represented IF and H&E figures. **e,f** P values were calculated using two-tailed unpaired Student's *t*-test. Source data are provided as a source data file.

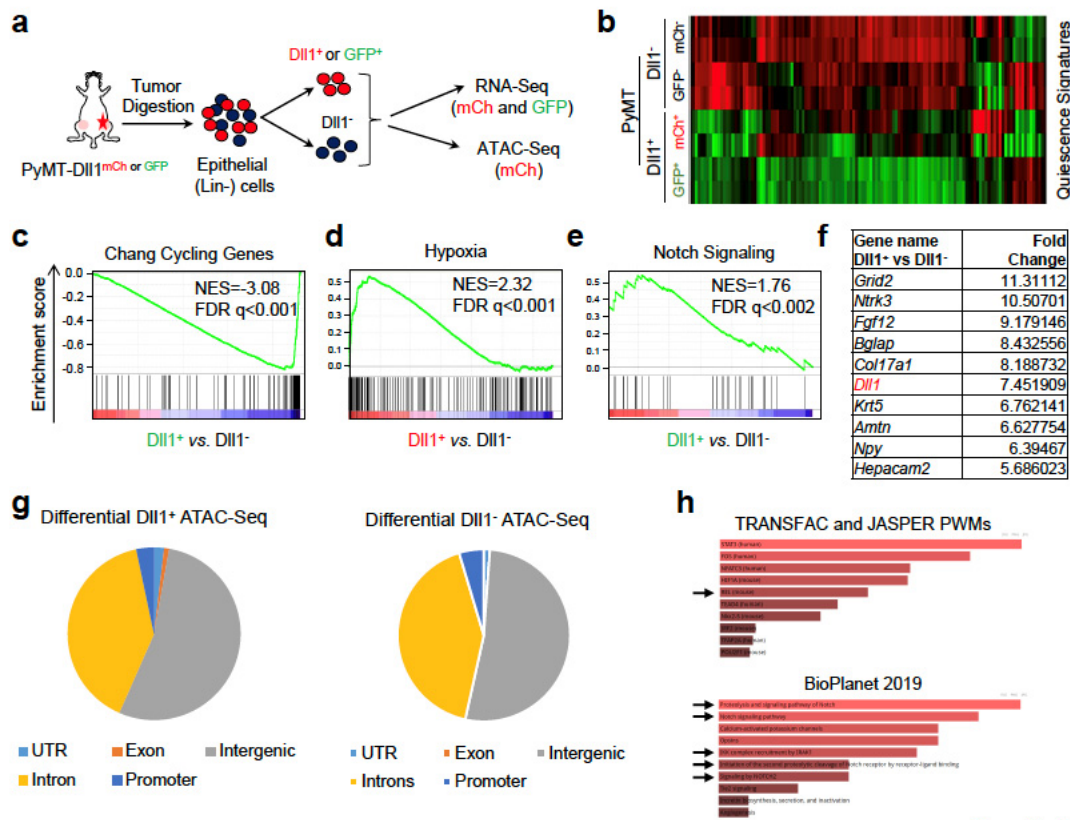

**Supplementary Fig. 5: RNA-seq and ATAC-seq suggest that DII1<sup>+</sup> tumor cells are quiescent and express pro-tumoral signatures.** **a** Schematic diagram represents the experimental strategy to perform RNA-seq and ATAC-seq using DII1<sup>±</sup> tumor cells from PyMT-DII1<sup>mCh</sup> and PyMT-DII1<sup>GFP</sup> tumor. **b** The heat map shows the enrichment of quiescence signatures (Chang Cycling gene signature from GSEA C2 set) in DII1<sup>+</sup> tumor cells compared with DII1<sup>-</sup> tumor cells isolated from PyMT-DII1<sup>mCh</sup> or PyMT-DII1<sup>GFP</sup> tumors. **c,d, e** GSEAs of RNA-seq demonstrate decreased cycling genes or increased hypoxia and Notch pathway signatures in Lin<sup>-</sup> DII1<sup>+</sup> tumor cells compared to DII1<sup>-</sup> tumor cells isolated from PyMT-DII1<sup>mCh</sup> (red) and PyMT-DII1<sup>GFP</sup> (green) tumors, respectively. **f** 10-metastasis gene classifier was identified using stringent cut off of +5.5 fold change with a p-value less than 0.05 by combining PyMT-DII1<sup>mCh</sup> and PyMT-DII1<sup>GFP</sup> reporter mice's

RNA-seq data. **g** The pie charts show the chromatin accessibility in Dll1<sup>+</sup> and Dll1<sup>-</sup> tumor cells, indicating no dramatic differences. **h** EnrichR software was used to show enrichment of core 23 UP genes of GSEA (from Fig. 4e) for Notch and NF- $\kappa$ B pathway from combined ATAC-seq and RNA-seq analyses. PyMT-Dll1<sup>mCh</sup> model was used for both RNA-seq and ATAC-seq whereas PyMT-Dll1<sup>GFP</sup> was used only for RNA-seq (n=2 samples for Dll1<sup>+</sup> and n=2 samples for Dll1<sup>-</sup> Lin<sup>-</sup> tumor was used from PyMT-Dll1<sup>mCh</sup> tumors for RNA-seq; n=2 samples for Dll1<sup>+</sup> and n=2 samples for Dll1<sup>-</sup> Lin<sup>-</sup> tumor cells was used from PyMT-Dll1<sup>GFP</sup> tumors for RNA-seq; and n=4 Dll1<sup>-</sup> and n=3 Dll1<sup>+</sup> Lin<sup>-</sup> tumor cells isolated from PyMT-Dll1<sup>mCh</sup> tumors for ATAC-seq).

Human METABRIC

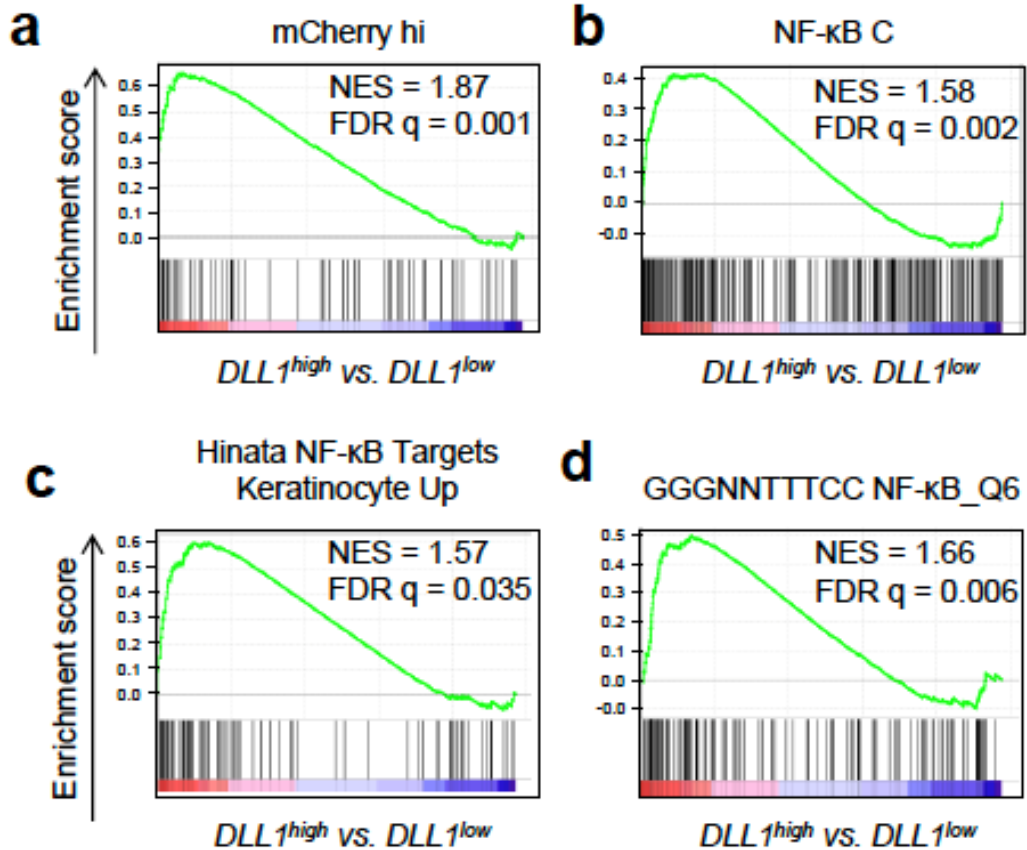

**Supplementary Fig. 6: Patient data show upregulation of multiple NF-κB signatures in  $DLL1^{high}$  patient tumors.** **a** GSEA depicts high enrichment of  $DLL1^{+}$  tumor cells signatures from PyMT<sup>mcherry</sup> to patient tumors (Luminal A and B) with high  $DLL1$  expression. **b-d** GSEAs show various increased NF-κB signatures in Luminal A and B patient tumors after stratifying them on  $DLL1$  levels. n=1140 patient tumors. The patient data was obtained from METABRIC dataset<sup>1,2</sup>.

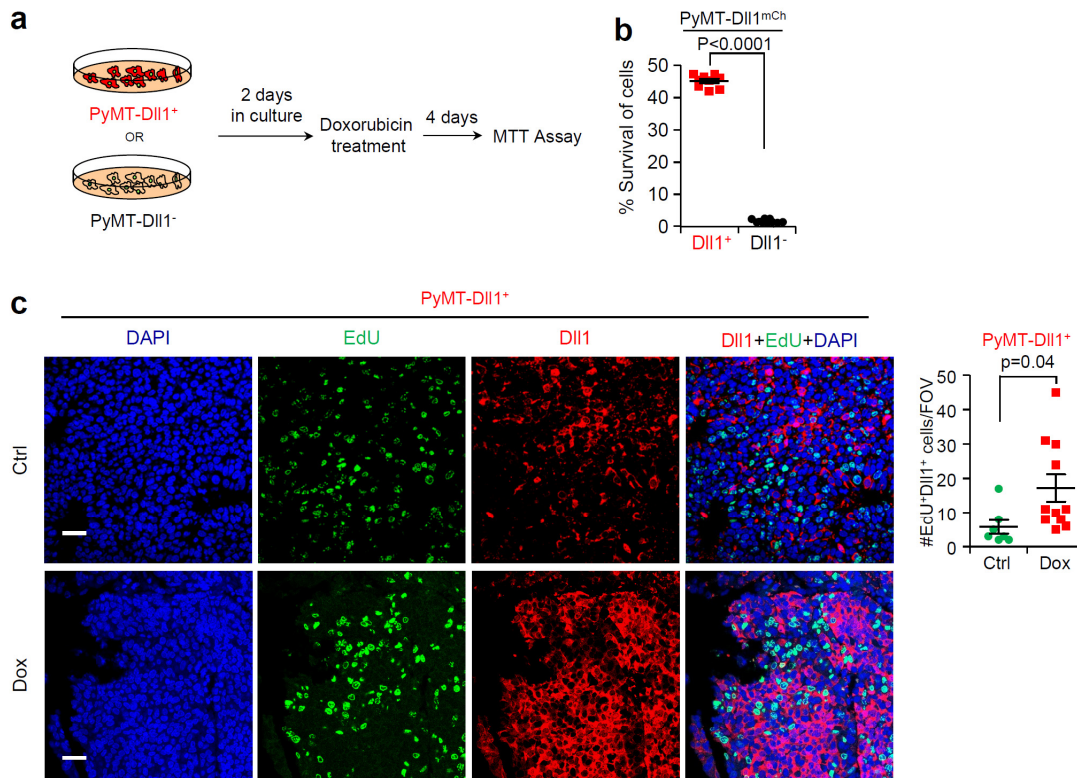

**Supplementary Fig. 7: Dll1<sup>+</sup> tumor cells are less-proliferating and chemotherapy-resistant.** **a** Schematic shows the experimental plan to perform *in vitro* drug-sensitive assay with Dll1<sup>+</sup> and Dll1<sup>-</sup> tumors using 100ng/mL dose of Doxorubicin. **b** MTT assay results show the doxorubicin-resistant characteristics of PyMT-Dll1<sup>+</sup> tumor cells compared with PyMT-Dll1<sup>-</sup> cells. Sorted Dll1<sup>+</sup> and Dll1<sup>-</sup> tumor cells were seeded in 96-well plate (n=9 wells each) for MTT assay. **c** The single color and merged IF images show the expression of Dll1 (red) and EdU<sup>+</sup> proliferating cells (green) in PyMT-Dll1<sup>+</sup> tumors upon treatment of saline or doxorubicin. mCherry antibody was used to detect Dll1<sup>mCh</sup> cells. The number of double positive (Dll1<sup>+</sup> and EdU<sup>+</sup>) cells were counted in the right. The dots in scatter plot represents the multiple field of views (indicated in image), which is obtained from n=3 tumors per group. Scale bars, 40  $\mu$ m. Data are presented as the

mean  $\pm$  SEM. P values were calculated using two-tailed unpaired Student's *t*-test. FOV is field of view. Source data are provided as a source data file.



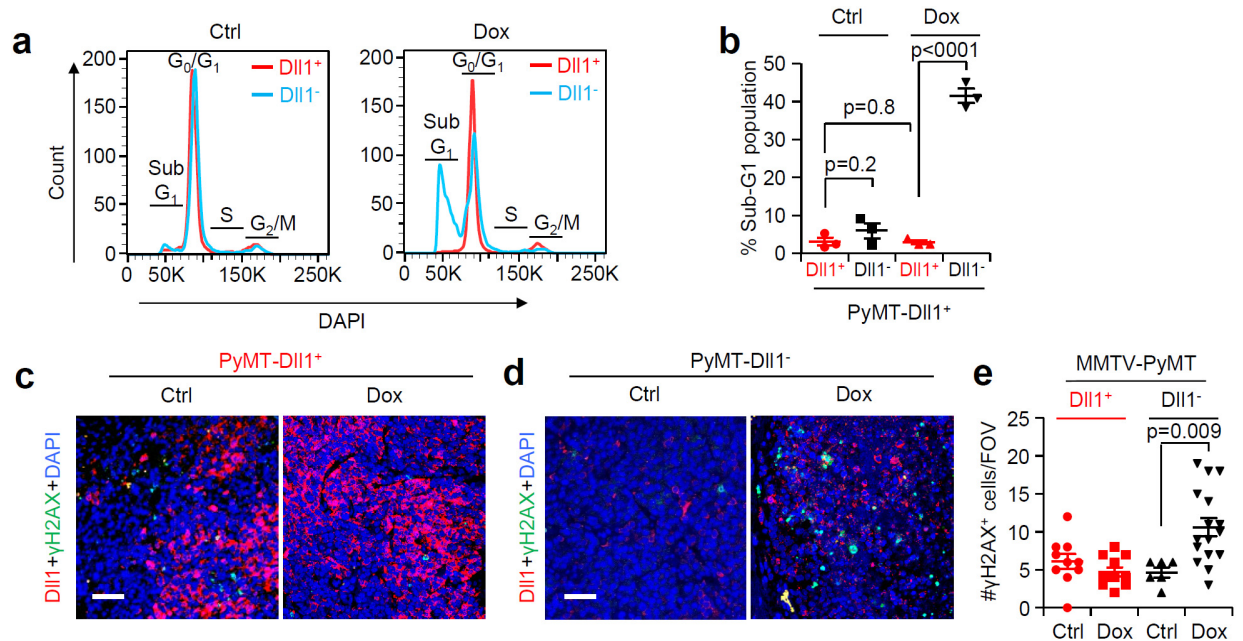

**Supplementary Fig. 8: DII1<sup>+</sup> tumor cells escape apoptosis.** **a,b** Cell cycle analyses of PyMT-DII1<sup>+</sup> tumor cells indicate a significant increase in the Sub-G1 population of DII1<sup>-</sup> tumor cells (blue line) compared with DII1<sup>+</sup> tumor cells (red line) upon doxorubicin treatment. The DII1<sup>+</sup> and DII1<sup>-</sup> tumor cells were separated based on the mCherry expression and percentages of apoptotic (Sub-G1) tumor cells were quantified in **b**. n=3 tumors for each group were analyzed for cell cycle by flow cytometry. **c,d** The representative IF images depict the γH2AX<sup>+</sup> DNA damage in PyMT-DII1<sup>+</sup> (**c**) and PyMT-DII1<sup>-</sup> (**d**) tumors upon saline or doxorubicin treatments, which are quantified in **e**. The formalin-fixed tumors specimens were stained with the mCherry antibody to detect DII1<sup>+</sup> tumor cells. The dots in scatter plot represent multiple field of views (indicated in figure) from n=3 tumors/group and the experiment was repeated three independent times. **b,e** P values were calculated using One-way ANOVA with Tukey's multiple-comparisons post hoc test. **b,e** Data are presented as the mean ± SEM. FOV is field of view. Scale bars, 40 μm (**c, d**). Source data are provided as a source data file.

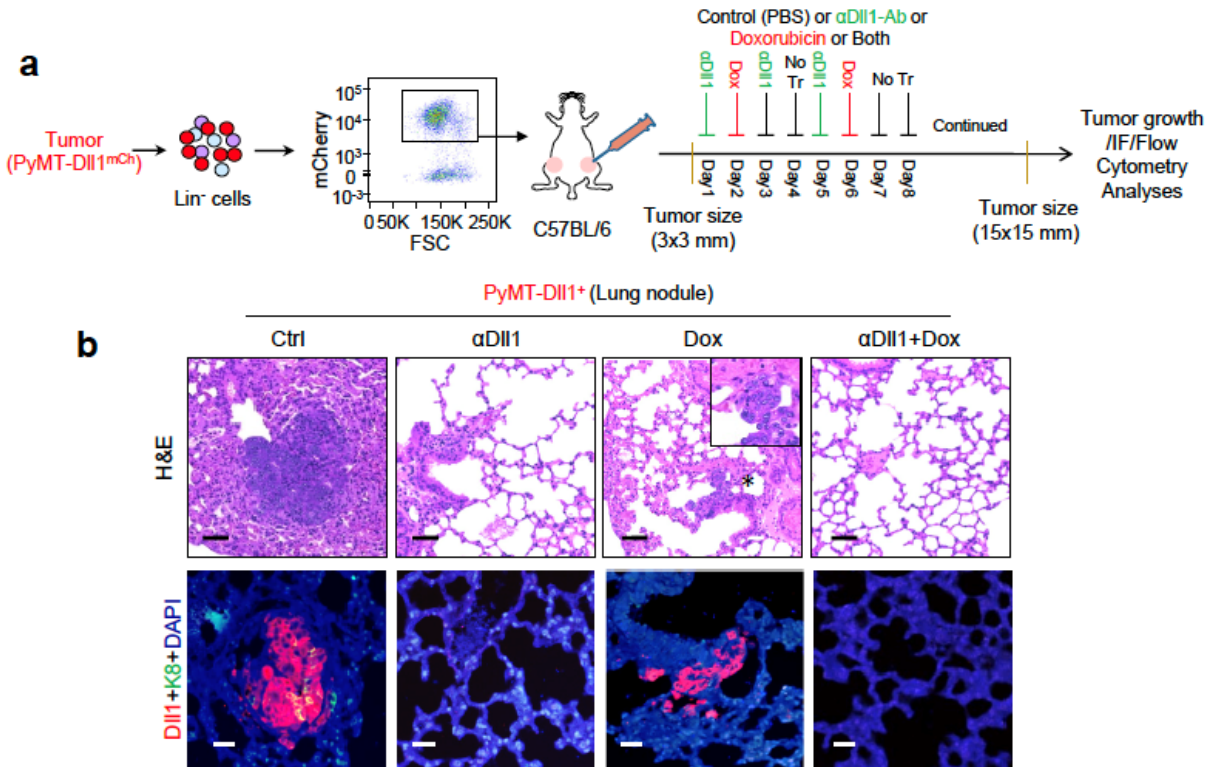

**Supplementary Fig. 9: DII1-blocking antibody inhibits metastasis of PyMT-DII1<sup>mCh</sup> bearing mice.** **a** We transplanted sorted PyMT-DII1<sup>+</sup> tumor cells into the mammary fat pad (MFP) of syngeneic C57BL/6 mice. The schematic diagram shows the experimental plan of *in vivo* treatment of DII1<sup>+</sup> tumors with and without DII1 blocking antibody (18mg/kg thrice a week) and doxorubicin (Dox, 1mg/kg twice a week). Control mice were treated with Saline. **b** Representative H&E and IF images show DII1 (mCherry) positive lung metastatic nodules in tumor-bearing mice from transplanted PyMT-DII1<sup>+</sup> tumor cells (data combined from two independent experiments, n=5 Ctrl, n=5 αDII1 ab, n=6 Dox and n=5

$\alpha$ Dll1 ab + Dox). mCherry antibody was used to detect Dll1<sup>mCh+</sup> cells. **b** Inset shows zoomed in area of lung metastasis. Scale bars, 20  $\mu$ m (**b**).

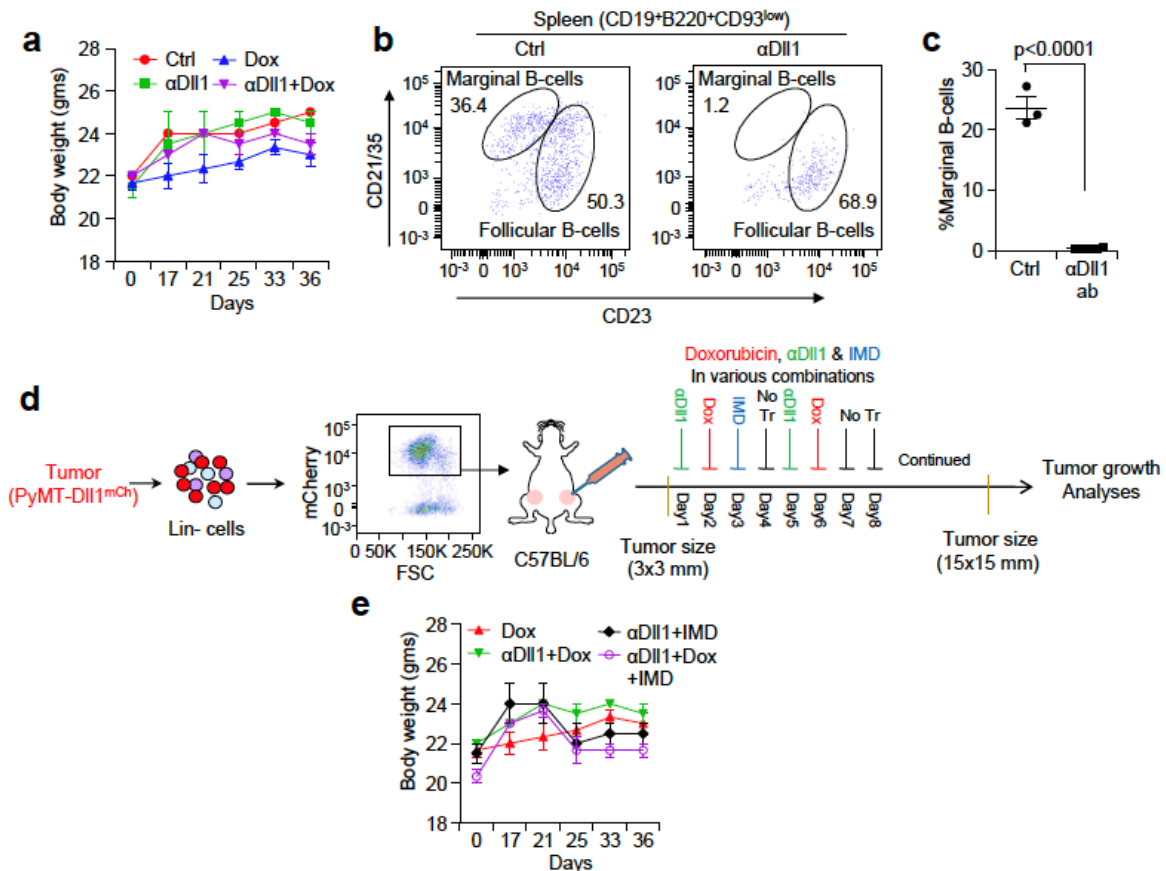

**Supplementary Fig. 10: Dll1-blocking antibody has no dramatic side effects on mice health.** We transplanted sorted PyMT-DII1<sup>+</sup> tumor cells into the mammary fat pad (MFP) of syngeneic C57BL/6 mice. We treated PyMT-DII1<sup>+</sup> tumors with and without DII1 blocking antibody (18mg/kg thrice a week) and doxorubicin (1mg/kg twice a week). Control mice were treated with Saline. **a** Whole-body weight of mice with the treatment shows no significant toxicity after the indicated treatments. n=2 Ctrl, n=2  $\alpha$ DII1 ab, n=3 Dox and n=2  $\alpha$ DII1 ab + Dox mice and each mouse had two contralateral mammary gland

tumors. **b,c** Representative flow cytometry analysis (**b**) shows the effectiveness of Dll1-blocking antibody treatment by depletion of marginal B-cell population of the spleen, which is quantified in **c**. Marginal B-cells decrease in spleen of treated mice (n=3 spleens for ctrl, n=6 spleens for  $\alpha$ Dll1 ab treated groups (n=3 alone  $\alpha$ Dll1 ab and n=3 spleens for  $\alpha$ Dll1+Dox). **d** We transplanted sorted PyMT-Dll1<sup>+</sup> tumor cells into the mammary fat pad (MFP) of syngeneic C57BL/6 mice. The schematic diagram shows the experimental plan of *in vivo* treatment of Dll1<sup>+</sup> tumors with and without Dll1 blocking antibody (18mg/kg thrice a week), doxorubicin (1mg/kg twice a week) and IMD (0.5mg/kg once a week). Control mice were treated with Saline. **e** Whole-body weight of mice with the treatment shows no significant toxicity after the indicated treatments. n=3 Dox, n=2  $\alpha$ Dll1 ab+Dox, n=2  $\alpha$ Dll1 ab+IMD, n=3  $\alpha$ Dll1 ab+Dox+IMD mice and each mouse had two contralateral mammary gland tumors. P values were calculated using two-way ANOVA with Bonferroni post-test adjustment (**a,e**) and two-tailed unpaired Student's *t*-test (**c**). **a,c,e** Data are presented as the mean  $\pm$  SEM. Source data are provided as a source data file.









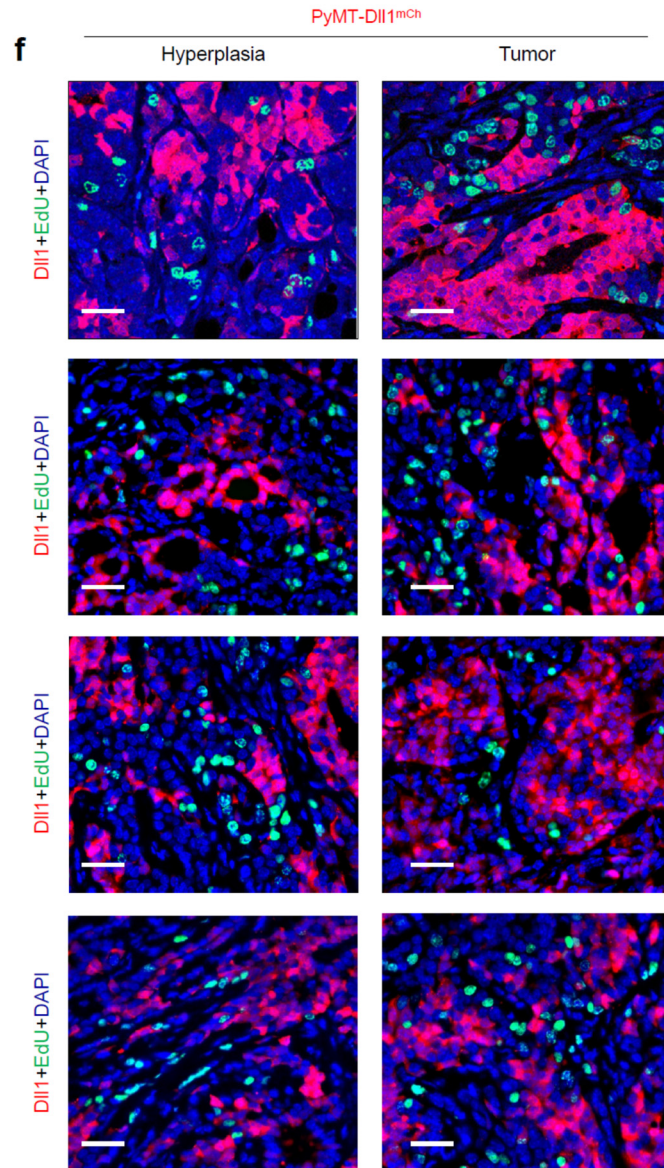

**Supplementary Fig. 11:** Representative IF images from Figure 3f (n=3 tumors per group). Scale bars, 60  $\mu$ m.



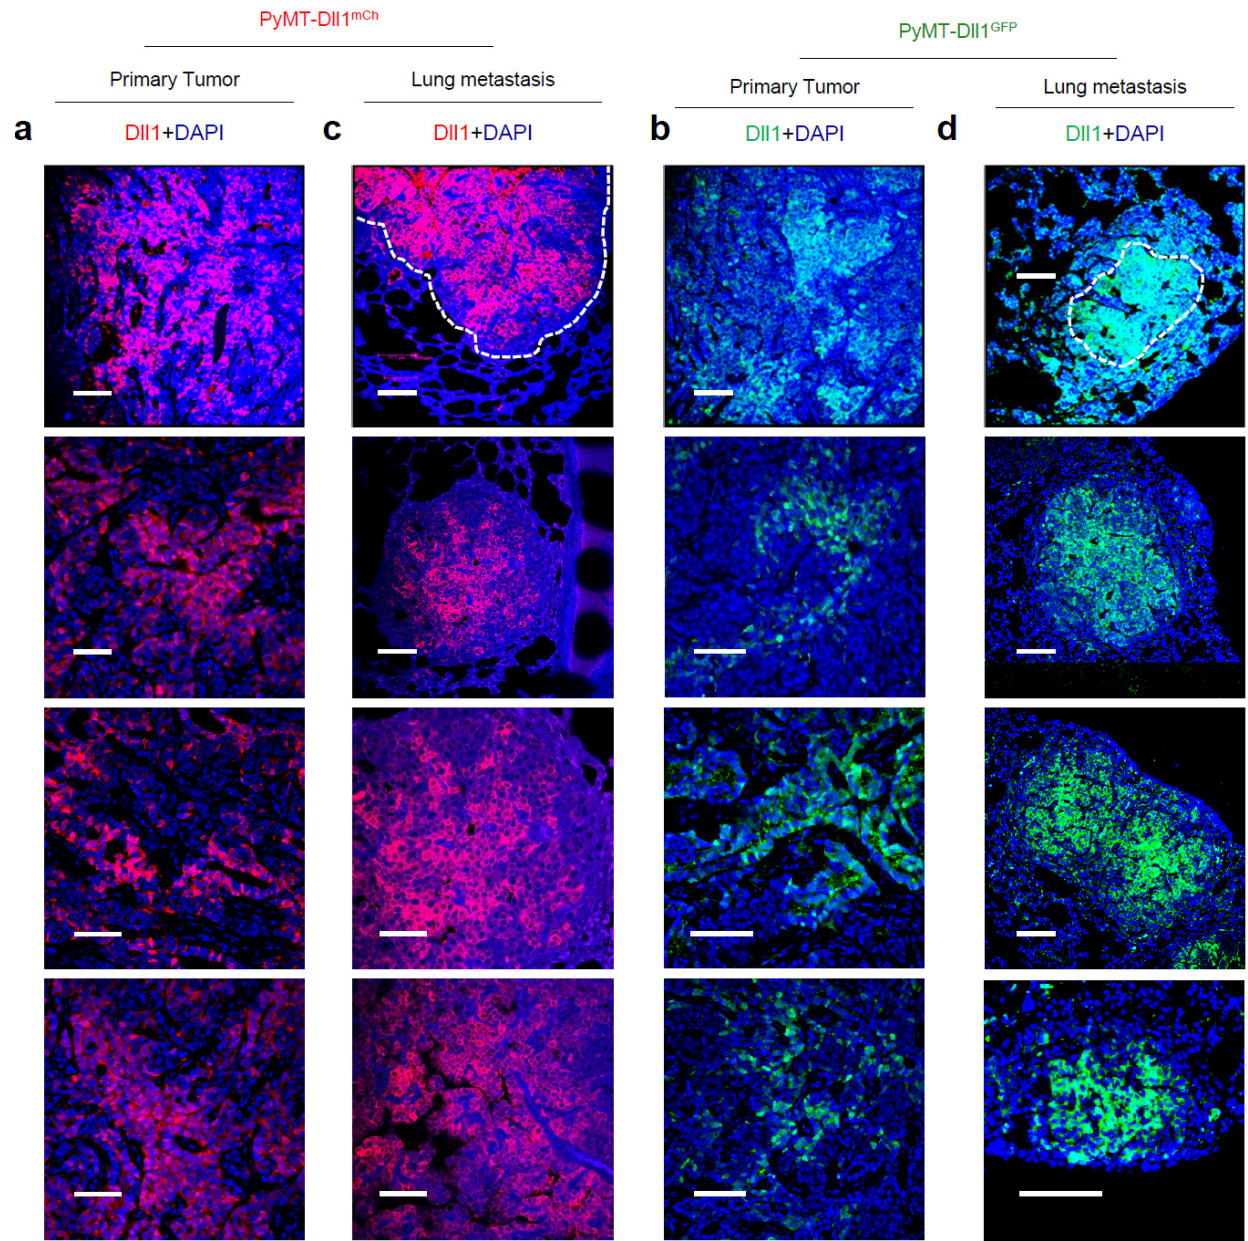

**Supplementary Fig. 11:** Representative IF images from Supplementary Fig. 4a-d. n>3 tumors or lung nodules per panel. Scale bars, 60  $\mu$ m.

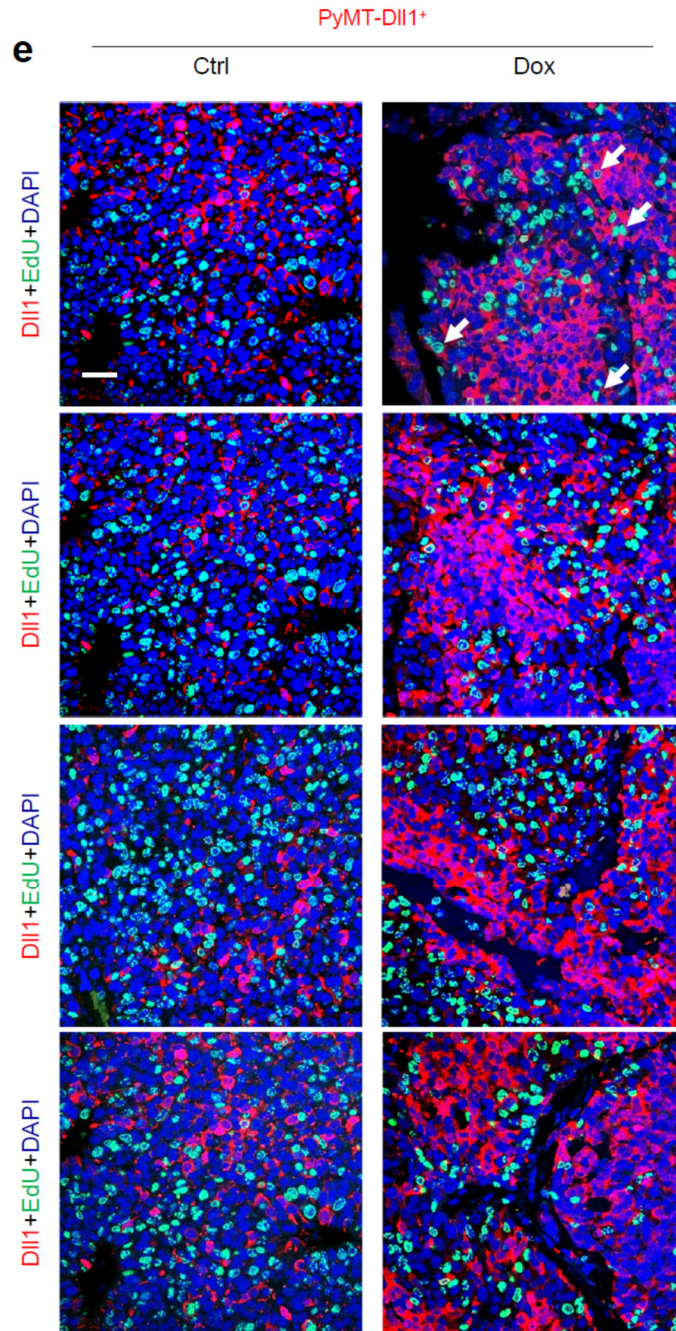

**Supplementary Fig. 11:** Representative IF images from Figure 5e (n=3 tumors per group). The white arrows indicate proliferating Dll1<sup>+</sup> EdU<sup>+</sup> tumor cells upon doxorubicin treatment. Scale bars, 60  $\mu$ m.



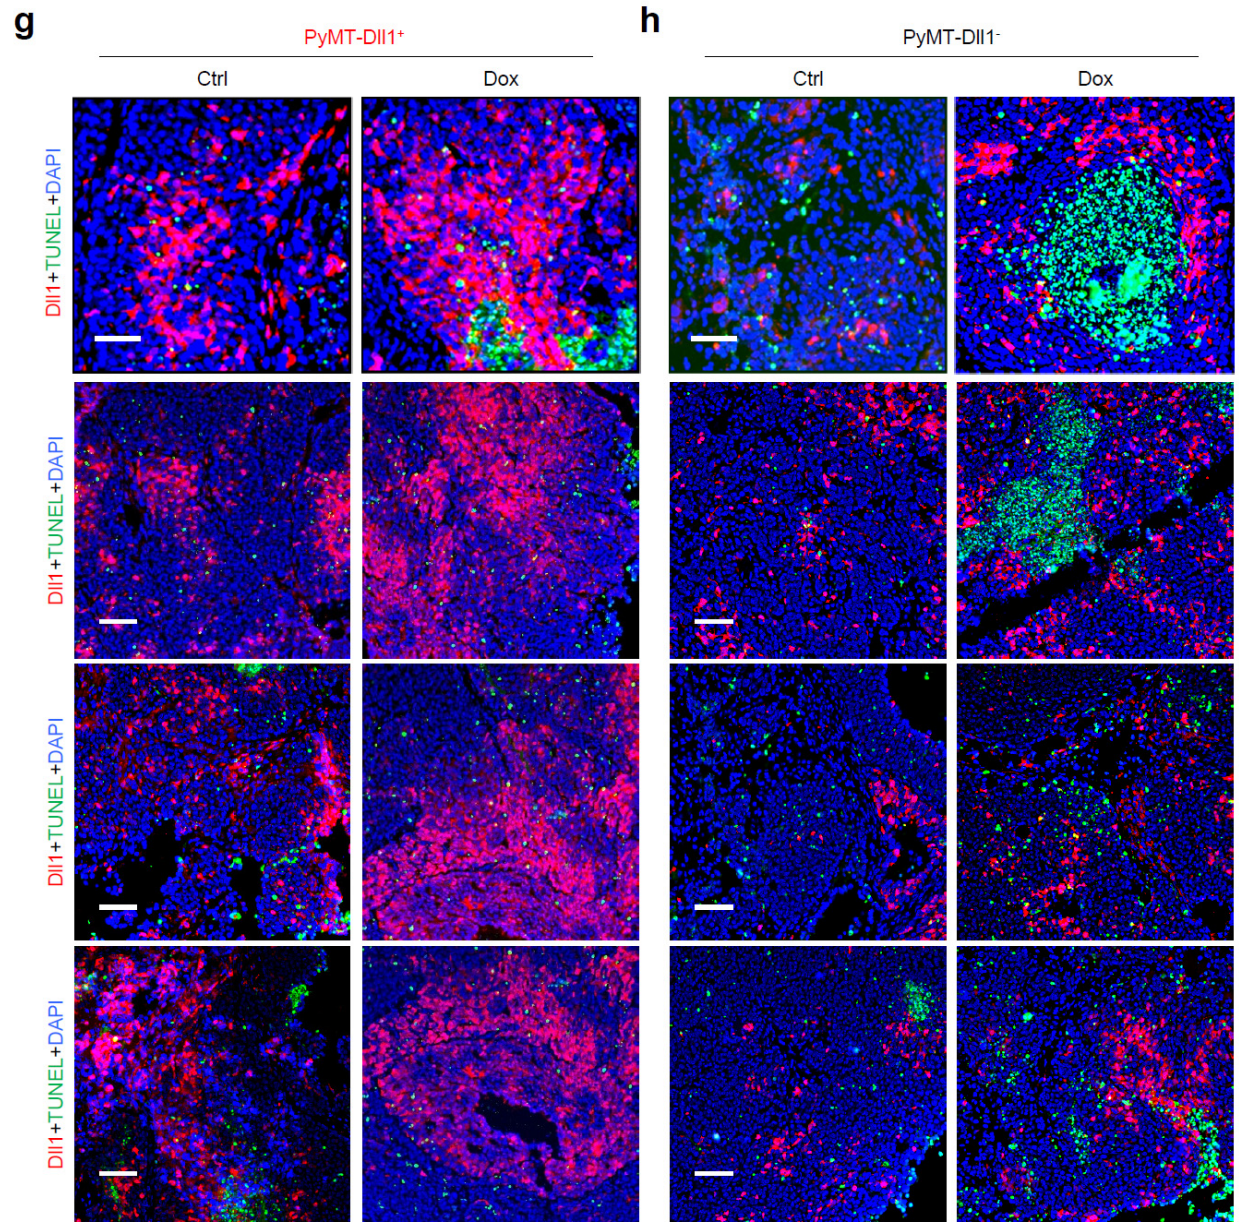

**Supplementary Fig. 11:** Representative IF images from Figure 5g,h (n=4 tumors per group). Scale bars, 60 μm.



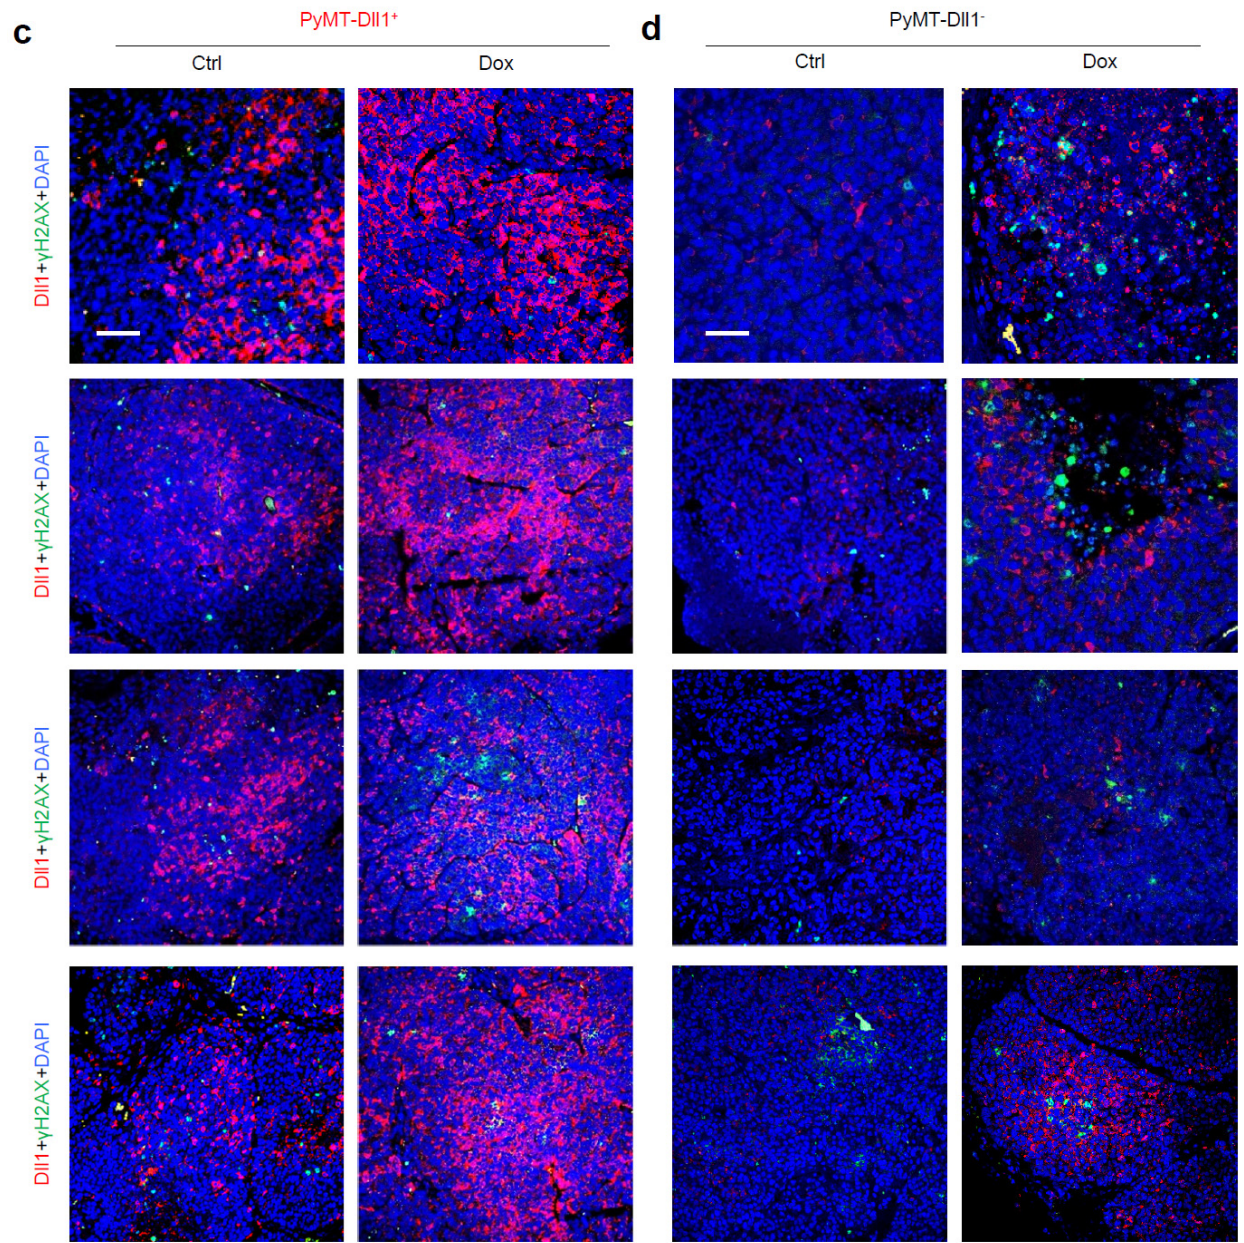

**Supplementary Fig. 11:** Representative IF images from Supplementary Figure 8c-d (n=3 tumors per group). Scale bars, 40  $\mu$ m.



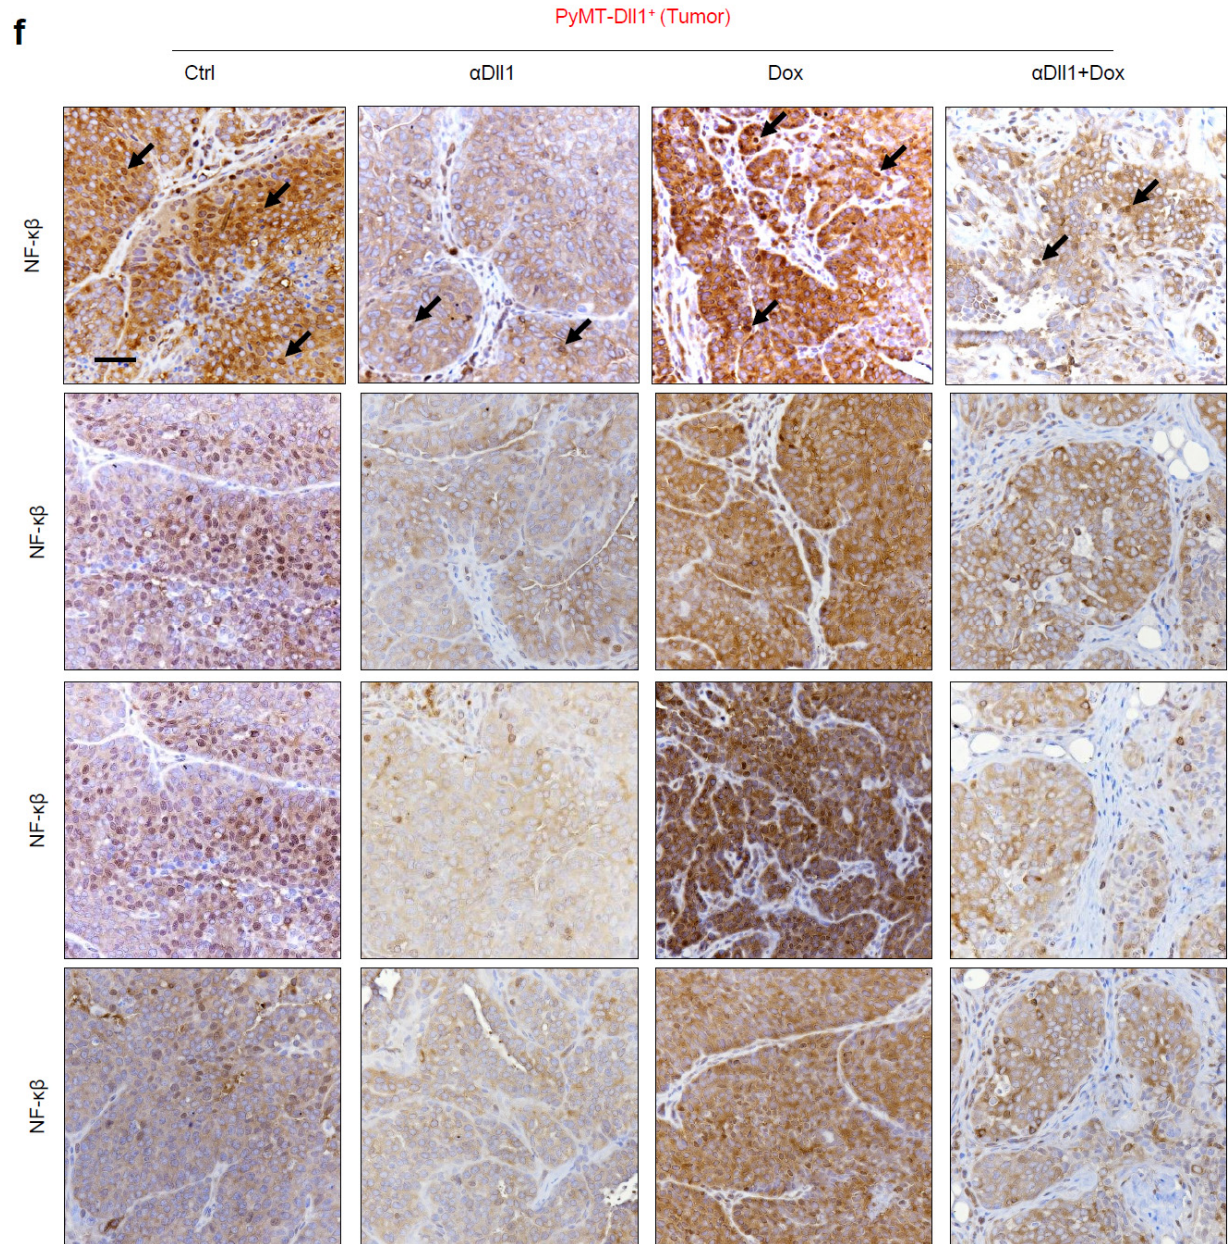

**Supplementary Fig. 11:** Representative IHC images from Figure 6f (n=3 tumors per group). The black arrows indicate nuclear translocation of NF- $\kappa$ B. Scale bars, 60  $\mu$ m.

Source file for western blot from Fig.1b.

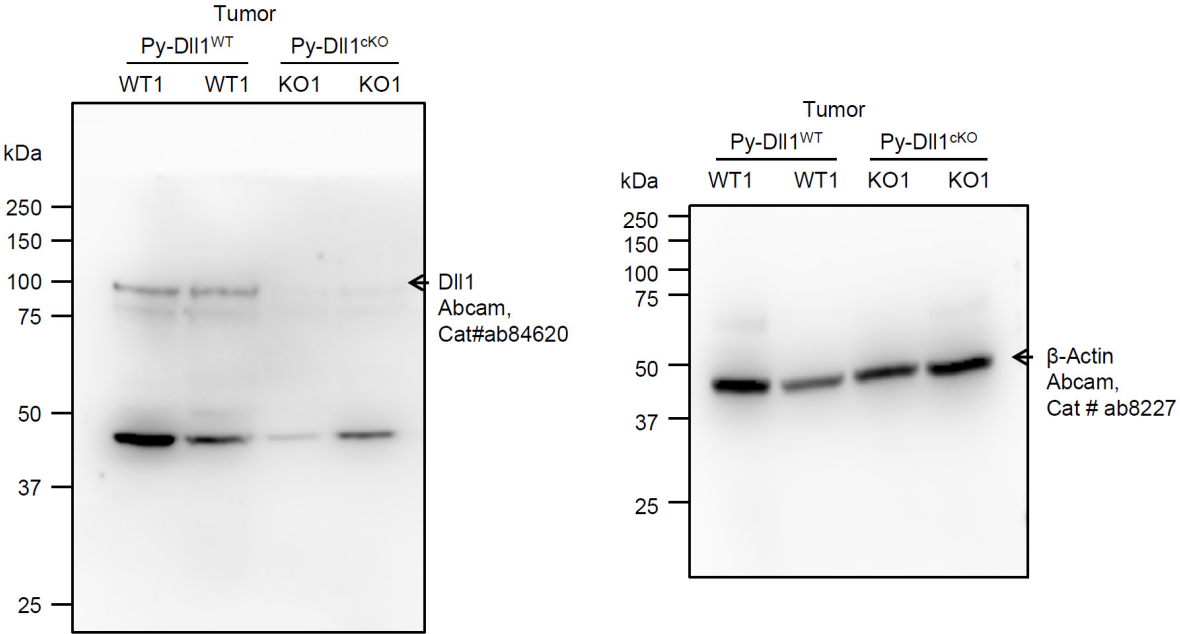

Full scan western blot images related to the figure 1b.

**Supplementary Table 1: Antibody used for flow cytometry**

| Antibody     | Fluorochrome | Dilution | Catalog # | Company         |
|--------------|--------------|----------|-----------|-----------------|
| CD24         | PE           | 1:100    | 553262    | BD Biosciences  |
| CD24         | BV421        | 1:100    | 562563    | BD Biosciences  |
| CD29         | FITC         | 1:100    | MCA2298   | Serotec/Bio-Rad |
| CD31         | Biotin       | 1:100    | 558737    | BD Biosciences  |
| CD45         | Biotin       | 1:100    | 553078    | BD Biosciences  |
| Ter-119      | Biotin       | 1:100    | 553672    | BD Biosciences  |
| Streptavidin | PE-Cy7       | 1:150    | SA1012    | Invitrogen      |
| CD19         | Bv785        | 1:100    | 115543    | BioLegend       |
| CD45R/B220   | APC          | 1:100    | 103212    | BioLegend       |
| CD93 (AA4.1) | PE-Cy7       | 1:100    | 136506    | BioLegend       |
| CD23         | PE           | 1:100    | 553139    | BD Biosciences  |
| CD21/35      | APC-Cy7      | 1:100    | 123418    | BioLegend       |

**Supplementary Table 2: Antibody used for IF and IHC**

| Antibodies            | IF    | IHC   | Company and catalog number                     |
|-----------------------|-------|-------|------------------------------------------------|
| K14 (rabbit)          | 1:100 | -     | BioLegend, Cat # 905304                        |
| K14 (chicken)         | 1:100 | -     | BioLegend, Cat# 906001                         |
| K14 (new rabbit)      | 1:75  | -     | Sinobiological, Cat# 100129-RP02               |
| K5 (rabbit)           | 1:40  | -     | Abcam, Cat# ab52635                            |
| K8                    | 1:100 | -     | Developmental Studies Hybridoma Bank, TROMA-1s |
| GFP                   | 1:200 | -     | Abcam, Cat # ab13970                           |
| mCherry (rabbit)      | 1:100 | -     | Abcam, Cat # ab167453                          |
| mCherry (mouse)       | 1:100 | -     | Abcam, Cat # ab125096                          |
| $\gamma$ H2AX         | 1:100 | -     | Abcam, Cat # ab26350                           |
| NF- $\kappa$ B (RelA) | -     | 1:200 | Cell Signaling, Cat# 8242                      |
| dsRed                 | 1:100 | -     | Living Colors, Cat# 632392                     |



**Supplementary Table 3: Antibody used for western blot**

| Antibodies     | Western blot | Company and catalog number |
|----------------|--------------|----------------------------|
| Dll1           | 1:1000       | Abcam, Cat # ab84620       |
| $\beta$ -Actin | 1:10,000     | Abcam, Cat # ab8227        |

**Supplementary Table 4: Primers used for qRT-PCR**

| Gene         | Species | Forward              | Reverse              |
|--------------|---------|----------------------|----------------------|
| <i>Dll1</i>  | Mouse   | GCGAGCTGCACGGACCTTGA | GCCCAAGGGGCAATGGCAGG |
| <i>Gapdh</i> | Mouse   | CCCAATGTGTCCGTCGTG   | GCCTGCTTACCACCTTCT   |

**Supplementary Table 5: Reagent and Resource**

| Reagent/Kit                                                                         | Source                   | Identifier    |
|-------------------------------------------------------------------------------------|--------------------------|---------------|
| Tamoxifen                                                                           | Sigma-Aldrich            | Cat# T5648    |
| IMD                                                                                 | Tocris                   | Cat# 2611     |
| Purelink RNA mini kit                                                               | ThermoFisher             | Cat#12183018A |
| Rabbit Anti-caspase 3, Active                                                       | BD Biosciences           | Cat#550480    |
| Click-iT Plus EdU Alexa Fluor 594                                                   | Thermo Fisher Scientific | Cat#C10639    |
| Click-iT™ Plus TUNEL Assay for In Situ Apoptosis Detection Kit, Alexa Fluor 488 dye | Thermo Fisher Scientific | Cat#C10617    |
| MTT Reagent                                                                         | Sigma-Aldrich            | Cat#M5655     |
| B27 Supplement (50X), Serum-free                                                    | Thermo Fisher Scientific | Cat#17504044  |
| Recombinant Human Epidermal Growth Factor/EGF                                       | Novoprotein              | Cat#C029      |
| Recombinant Human Fibroblast Growth Factor 2/FGF-2                                  | Novoprotein              | Cat#C046      |

- 1 Curtis, C. *et al.* The genomic and transcriptomic architecture of 2,000 breast tumours reveals novel subgroups. *Nature* **486**, 346-352, doi:10.1038/nature10983 (2012).
- 2 Pereira, B. *et al.* The somatic mutation profiles of 2,433 breast cancers refines their genomic and transcriptomic landscapes. *Nature communications* **7**, 11479, doi:10.1038/ncomms11479 (2016).
